# Supplementary material for: Effect of Nutritional Habits on the Glycemic Response to Different Carbohydrate Diet in Children with Type 1 Diabetes Mellitus
Source: MDPI journal article supplement (doi:10.3390/nu13113815), 2021-10-27
Supplement: s1 [file s1]

**Supplementary Table S1.** Comparison of the most frequently consumed foods by patients in different diets with respect to glycemic parameters.

| Category                | The most frequently selected product | Median for 30% N = 15 (%) | Median for 50% N = 8 (%) | p-value | 25cent for 30% N=16 (%) | 25cent for 50% N=7 (%) | p-value | 5cent for 30% N=18 (%) | 5cent for 50% N= 16 (%) | p-value       | CV (%) for 30% N=7 (%) | CV (%) for 50% N= 16 (%) | p-value | TBR70 for 30% N=6 (%) | TBR70 for 50% N=17 (%) | p-value       |
|-------------------------|--------------------------------------|---------------------------|--------------------------|---------|-------------------------|------------------------|---------|------------------------|-------------------------|---------------|------------------------|--------------------------|---------|-----------------------|------------------------|---------------|
| Sweets and snacks       | Chocolate                            | 10 (66.67%)               | 4 (50.00%)               | 0.657   | 11 (68.75%)             | 3 (42.86%)             | 0.363   | 11 (61.11%)            | 3 (60.00%)              | 1.00          | 4 (57.14%)             | 10 (62.50%)              | 1.00    | 3 (50.00%)            | 11 (64.71%)            | 0.643         |
| Dairy products and eggs | Milk                                 | 8 (53.33%)                | 5 (62.50%)               | 1.00    | 8 (50.00%)              | 5 (71.43%)             | 0.405   | 11 (61.11%)            | 2 (40.00%)              | 0.6175        | 5 (71.43%)             | 8 (50.00%)               | 0.405   | 3 (50.00%)            | 10 (58.82%)            | 1.00          |
| Grains                  | Whole meal bread                     | 11 (73.33%)               | 4 (50.00%)               | 0.3712  | 12 (75.00%)             | 3 (42.86%)             | 0.1819  | 12 (66.67%)            | 3 (60.00%)              | 1.00          | 3 (42.86%)             | 12 (75.00%)              | 0.1819  | 4 (66.67%)            | 11 (64.71%)            | 1.00          |
|                         | White bread                          | 7 (46.67%)                | 7 (87.50%)               | 0.0858  | 8 (50.00%)              | 6 (85.71%)             | 0.176   | 10 (55.56%)            | 4 (80.00%)              | 0.6106        | 4 (57.14%)             | 10 (62.50%)              | 1.00    | 4 (66.67%)            | 10 (58.82%)            | 1.00          |
| Fats                    | Butter                               | 10 (66.67)                | 4 (50.00%)               | 0.657   | 11 (68.75%)             | 3 (42.86%)             | 0.363   | 11 (61.11%)            | 3 (60.00%)              | 1.00          | 4 (57.14%)             | 10 (62.50%)              | 1.00    | 4 (66.67%)            | 10 (58.82%)            | 1.00          |
| Fruits                  | Apples                               | 11 (73.33%)               | 7 (87.50%)               | 0.6214  | 12 (75.00%)             | 6 (85.71%)             | 1.00    | 13 (72.22%)            | 5 (100.00%)             | 0.5453        | 5 (71.43%)             | 13 (81.25%)              | 0.6214  | 5 (83.33%)            | 13 (76.47%)            | 1.00          |
| Vegetables              | Tomatoes                             | 8 (53.33%)                | 5 (62.50%)               | 1.00    | 8 (50.00%)              | 5 (71.43%)             | 0.405   | 11 (61.11%)            | 2 (40.00%)              | 0.6175        | 6 (85.71%)             | 7 (43.75%)               | 0.0886  | 3 (50.00%)            | 10 (58.82%)            | 0.155         |
|                         | Potatoes                             | 8 (53.33%)                | 3 (37.50%)               | 0.6668  | 8 (50.00%)              | 3 (42.86%)             | 1.00    | 9 (50.00%)             | 2 (40.00%)              | 1.00          | 2 (28.57%)             | 9 (56.25%)               | 0.3707  | 1 (16.67%)            | 10 (58.82%)            | 1.00          |
| Meat and Fish           | Poultry meat                         | 9 (60.00%)                | 4 (50.00%)               | 0.685   | 9 (56.25%)              | 4 (57.14%)             | 1.00    | 12 (66.67%)            | 1 (20.00%)              | 0.1269        | 4 (57.14%)             | 9 (56.25%)               | 1.00    | 3 (50.00%)            | 10 (58.82%)            | 1.00          |
| Beverages               | Fruit juices                         | 14 (93.33%)               | 5 (62.50%)               | 0.1028  | 14 (87.50%)             | 5 (71.43%)             | 0.5573  | <b>17 (94.44%)</b>     | <b>2 (40.00%)</b>       | <b>0.0209</b> | 6 (85.71%)             | 13 (81.25%)              | 1.00    | <b>3 (50.00%)</b>     | <b>16 (94.12%)</b>     | <b>0.0401</b> |
|                         | Carbonated drinks                    | 5 (33.33%)                | 4 (50.00%)               | 0.657   | 6 (37.50%)              | 3 (42.86%)             | 1.00    | 6 (33.33)              | 3 (60.00%)              | 0.3428        | 3 (42.86%)             | 6 (37.50%)               | 0.3428  | <b>5 (83.33%)</b>     | <b>4 (23.53%)</b>      | <b>0.0183</b> |

<sup>1</sup> Fisher exact test was performed to obtain p-values. Statistically significant data was bolded (p < 0.05).
